# Supplementary material for: Concurrent remodelling of nucleolar 60S subunit precursors by the Rea1 ATPase and Spb4 RNA helicase
Source: eLife journal article supplement (doi:10.7554/elife.84877), 2023-03-17

Figure 2B, left panel

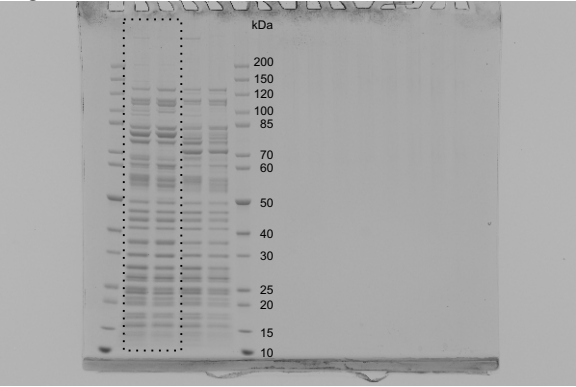

Figure 2B, left panel, anti-Flag

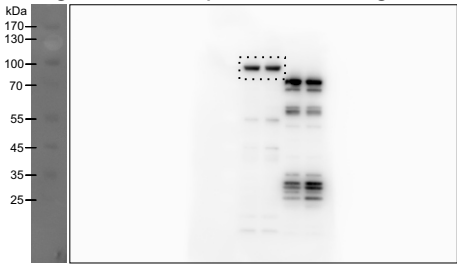

Figure 2B, left panel, anti-HA

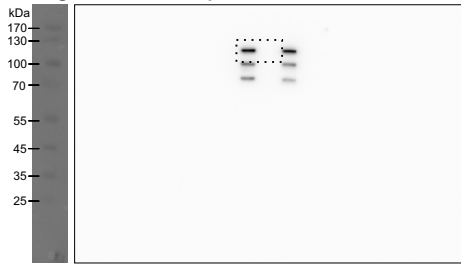

Figure 2B, left panel, anti-Has1

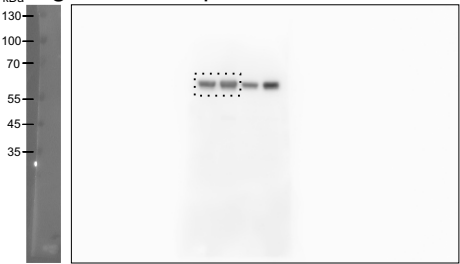

Figure 2B, left panel, anti-Rlp24

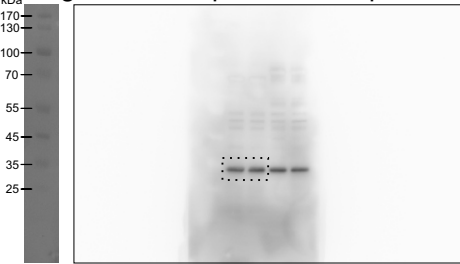

Figure 2B, left panel, anti-Nug1

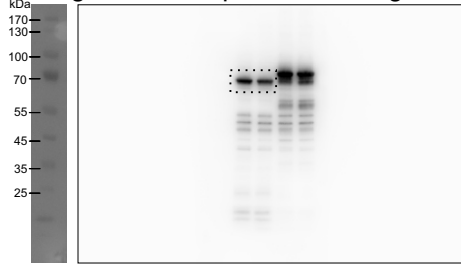

Figure 2B, left panel, anti-Nog2

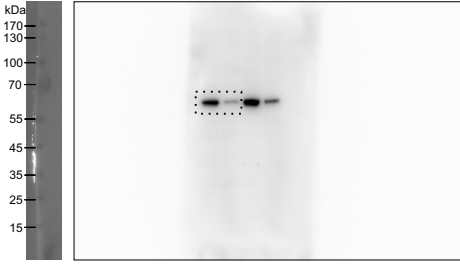

Figure 2B, left panel, anti-Bud20

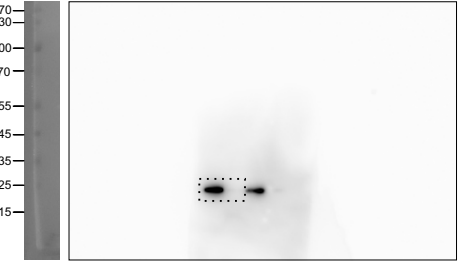

Figure 2B, left panel, anti-Arx1

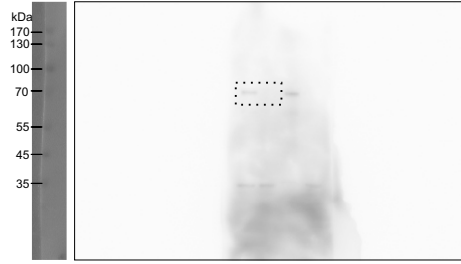

Figure 2B, left panel, anti-L3

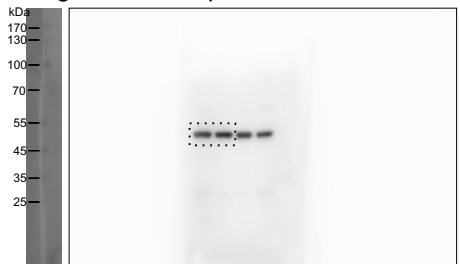

Figure 2B, right panel

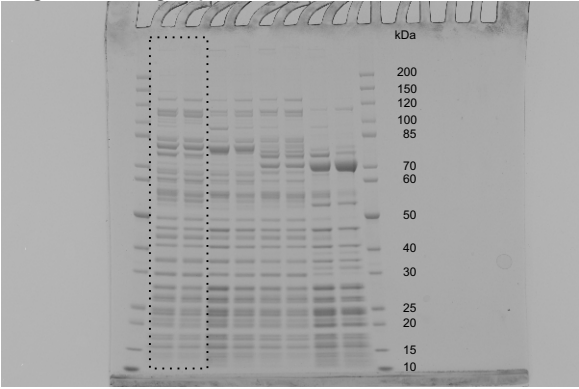

Figure 2B, right panel, anti-Flag

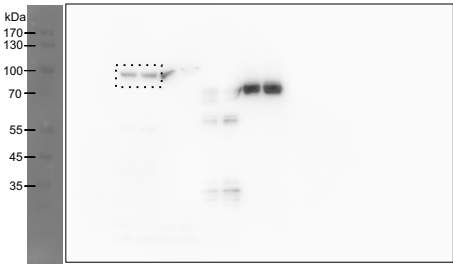

Figure 2B, right panel, anti-HA

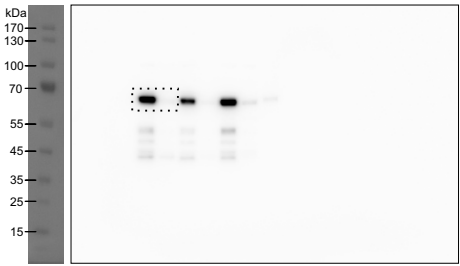

Figure 2B, right panel, anti-Has1

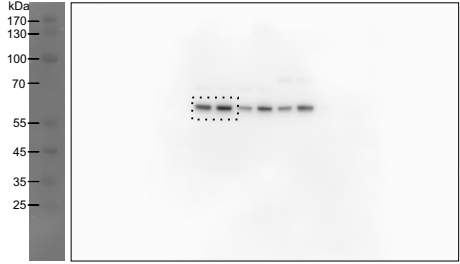

Figure 2B, right panel, anti-Rlp24

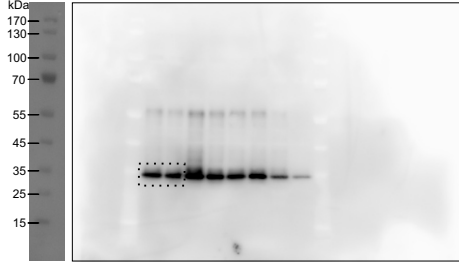

Figure 2B, right panel, anti-Nug1

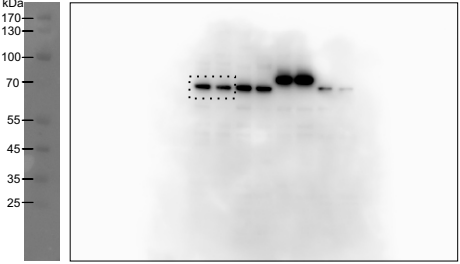

Figure 2B, right panel, anti-Nog2

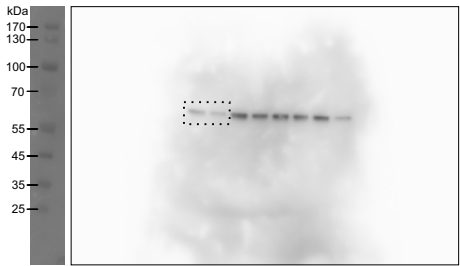

Figure 2B, right panel, anti-Bud20

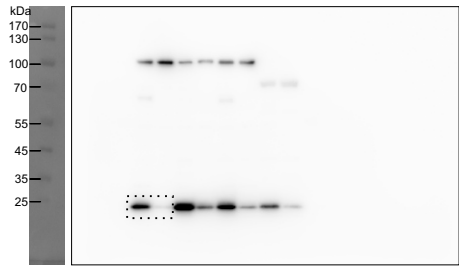

Figure 2B, right panel, anti-Arx1

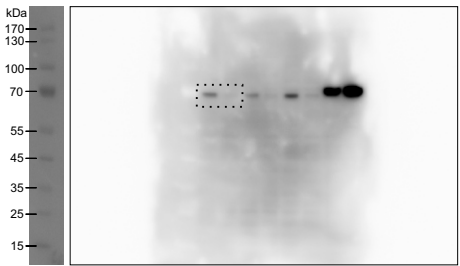

Figure 2B, right panel, anti-L3

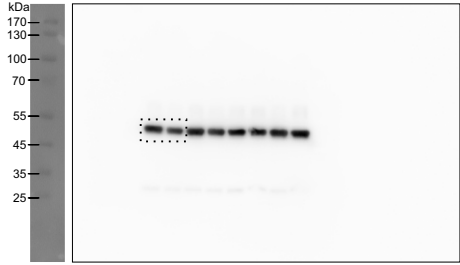

Supplement: fig2-data1 [file Figure2B_Source_data.pdf › Figure2_Source_data_1/Figure2B_Source_data.pdf]
