# Supplementary material for: Concurrent remodelling of nucleolar 60S subunit precursors by the Rea1 ATPase and Spb4 RNA helicase
Source: eLife journal article supplement (doi:10.7554/elife.84877), 2023-03-17

Figure 2C, left panel

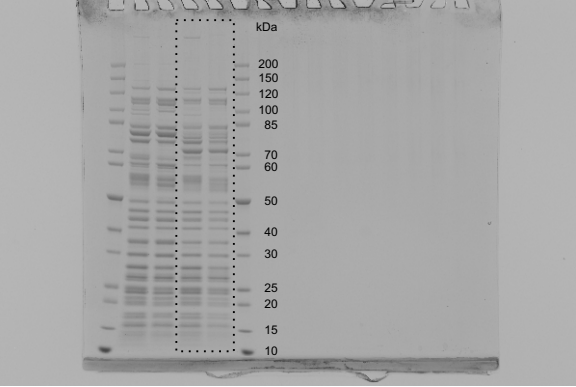

Figure 2C left panel, anti-Flag

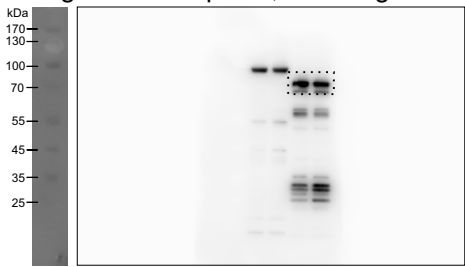

Figure 2C, left panel, anti-HA

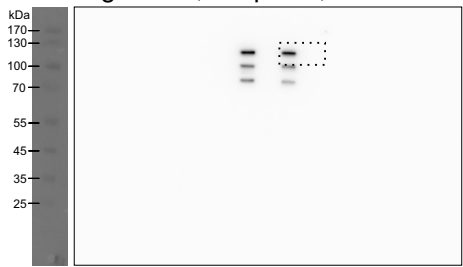

Figure 2C, left panel, anti-Has1

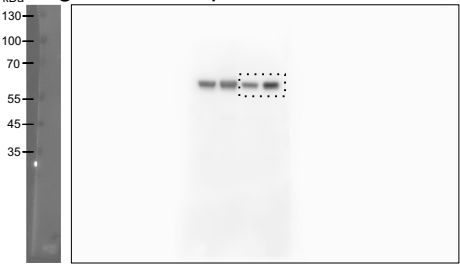

Figure 2C, left panel, anti-Ebp2

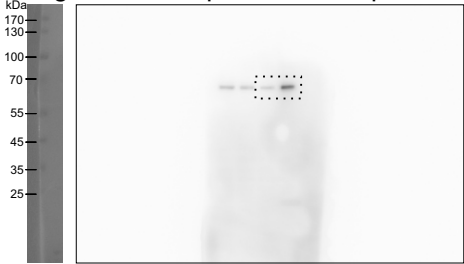

Figure 2C, left panel, anti-Rlp24

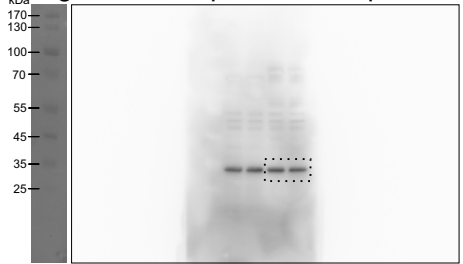

Figure 2C, left panel, anti-Nsa2

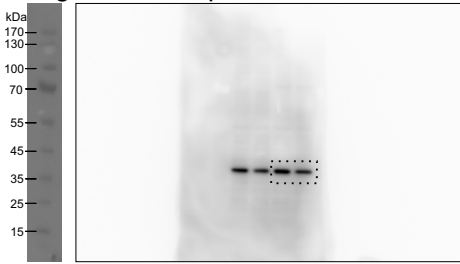

Figure 2C, left panel, anti-Nog2

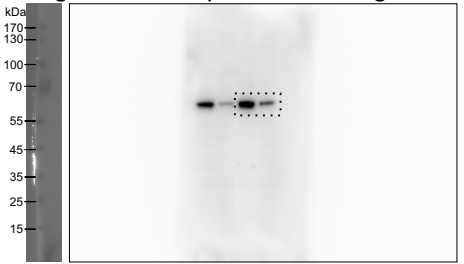

Figure 2C, left panel, anti-Bud20

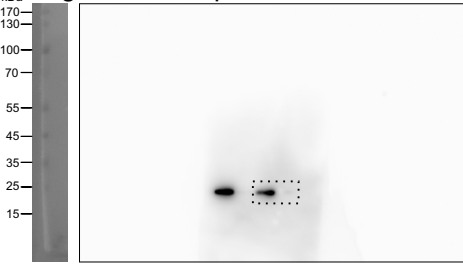

Figure 2C, left panel, anti-Arx1

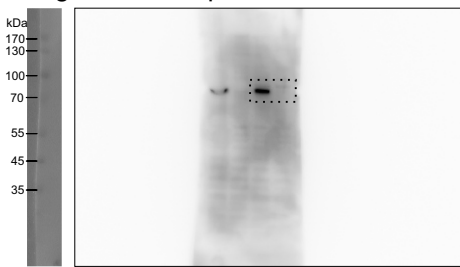

Figure 2C, left panel, anti-L3

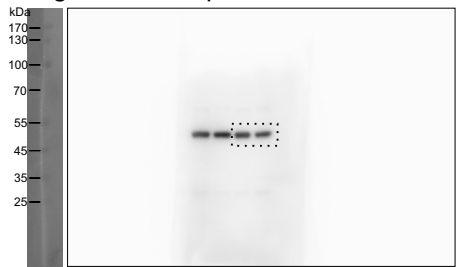

Figure 2C, right panel

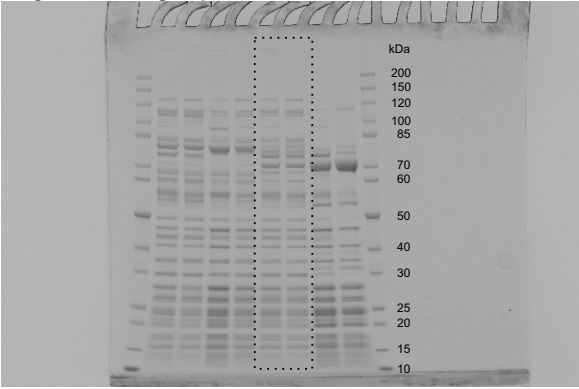

Figure 2C right panel, anti-Flag

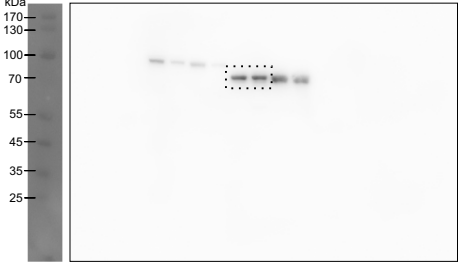

Figure 2C, right panel, anti-HA

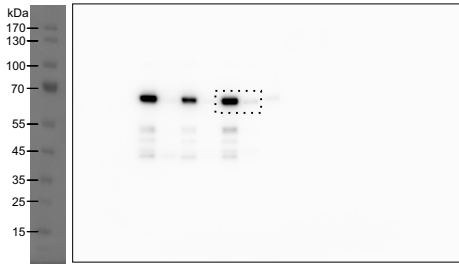

Figure 2C, right panel, anti-Has1

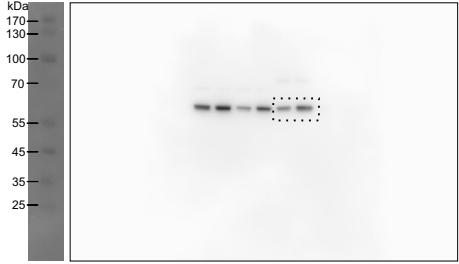

Figure 2C, right panel, anti-Ebp2

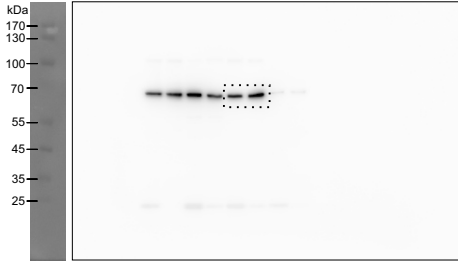

Figure 2C, right panel, anti-Rlp24

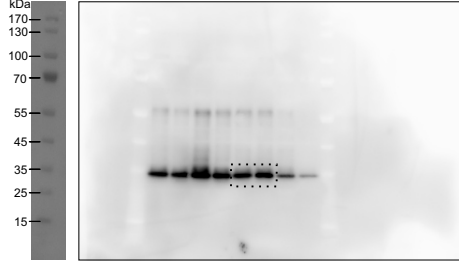

Figure 2C, right panel, anti-Nsa2

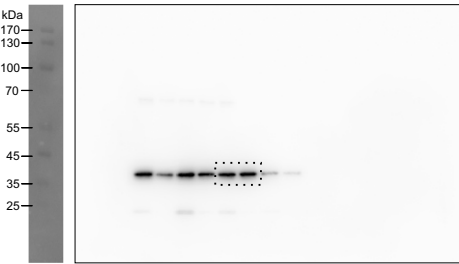

Figure 2C, right panel, anti-Nog2

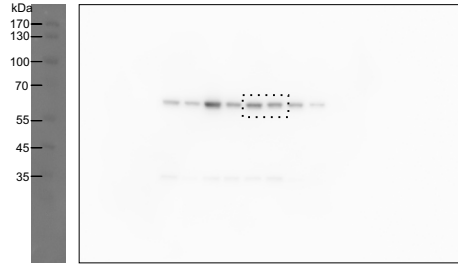

Figure 2C, right panel, anti-Bud20

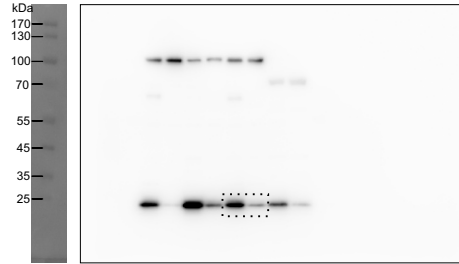

Figure 2C, right panel, anti-Arx1

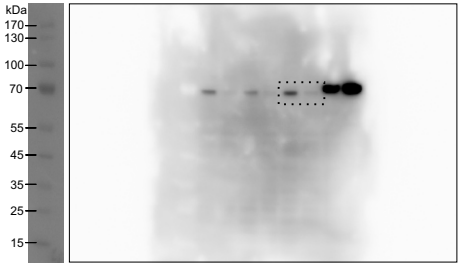

Figure 2C, right panel, anti-L3

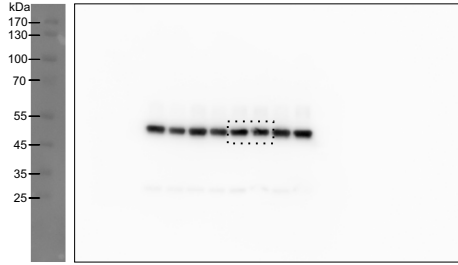

Supplement: fig2-data2 [file Figure2C_Source_data.pdf › Figure2_Source_data_2/Figure2C_Source_data.pdf]
