# Supplementary material for: Concurrent remodelling of nucleolar 60S subunit precursors by the Rea1 ATPase and Spb4 RNA helicase
Source: eLife journal article supplement (doi:10.7554/elife.84877), 2023-03-17

Figure 2D, left panel

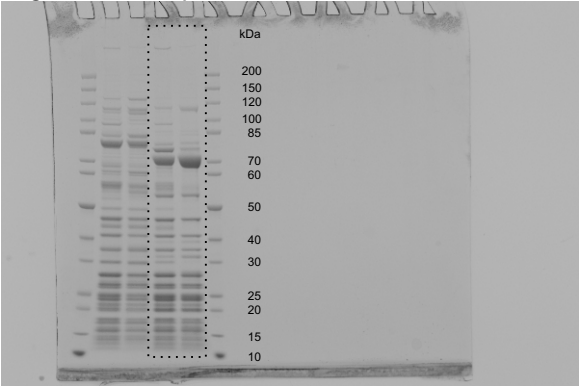

Figure 2D left panel, anti-Flag

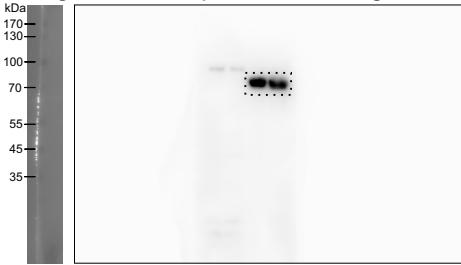

Figure 2D, left panel, anti-HA

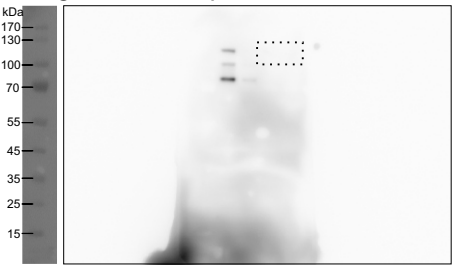

Figure 2D, left panel, anti-Rlp24

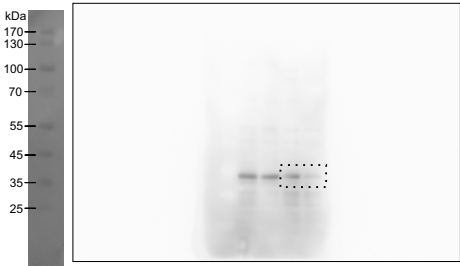

Figure 2D, left panel, anti-Nog1

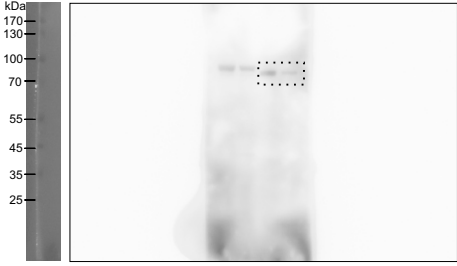

Figure 2D, left panel, anti-Nug1

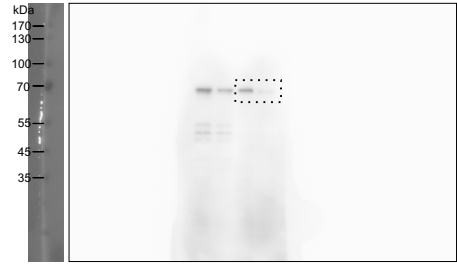

Figure 2C, left panel, anti-Nog2

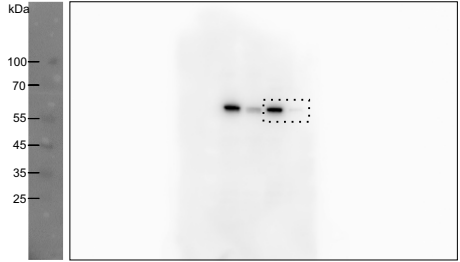

Figure 2C, left panel, anti-Rsa4

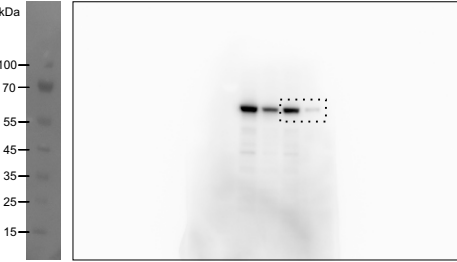

Figure 2C, left panel, anti-Bud20

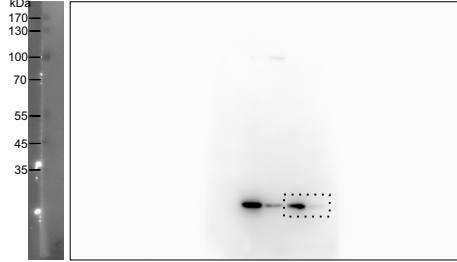

Figure 2D, left panel, anti-L3

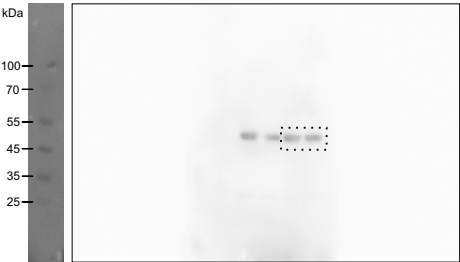

Figure 2D, right panel

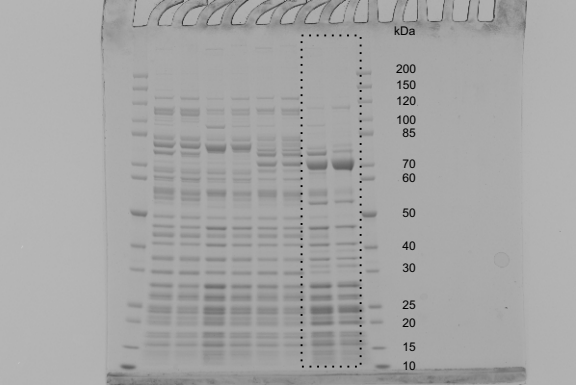

Figure 2D, right panel, anti-Flag

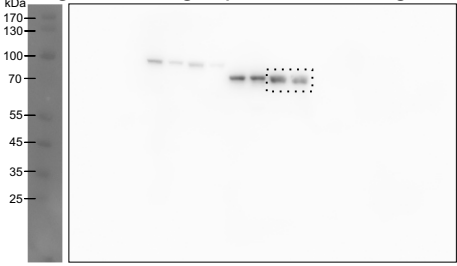

Figure 2D, right panel, anti-HA

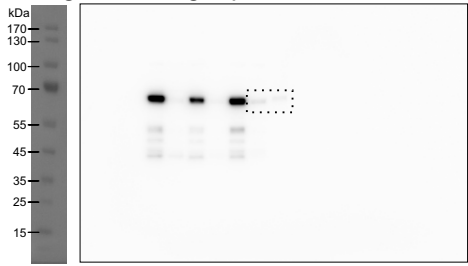

Figure 2D, right panel, anti-Rlp24

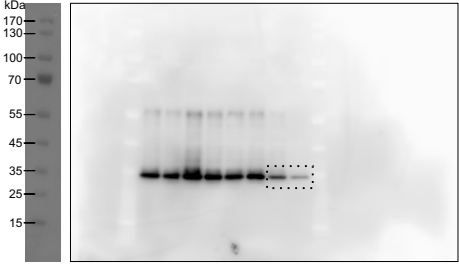

Figure 2D, right panel, anti-Nog1

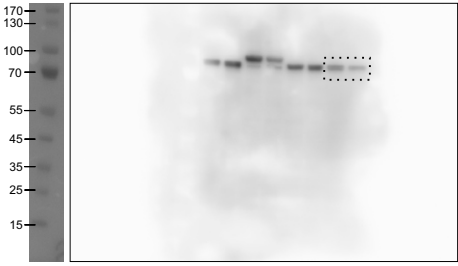

Figure 2D, right panel, anti-Nug1

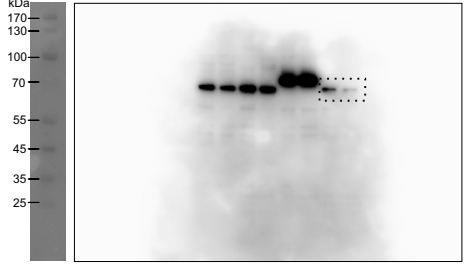

Figure 2C, right panel, anti-Nog2

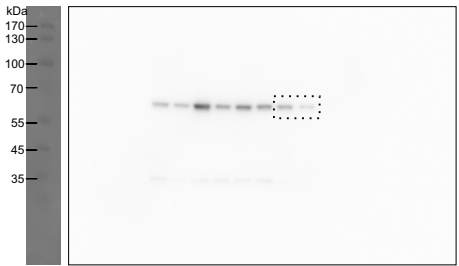

Figure 2C, right panel, anti-Rsa4

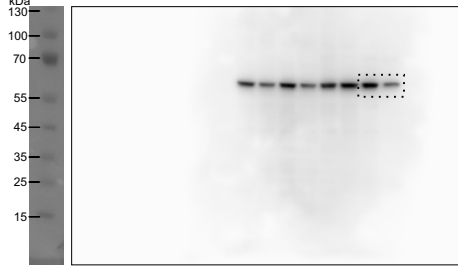

Figure 2C, right panel, anti-Bud20

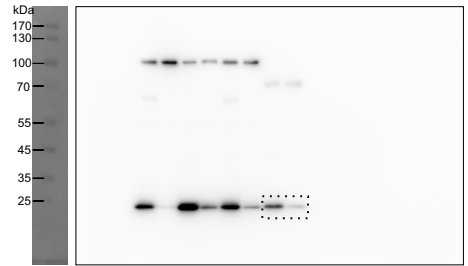

Figure 2D, right panel, anti-L3

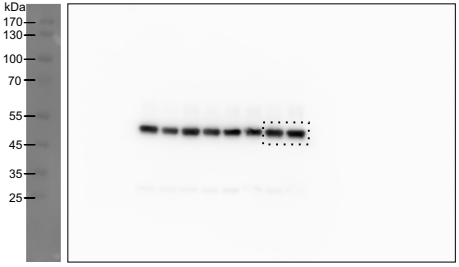

Supplement: fig2-data3 [file Figure2D_Source_data.pdf › Figure2_Source_data_3/Figure2D_Source_data.pdf]
