# Supplementary material for: Concurrent remodelling of nucleolar 60S subunit precursors by the Rea1 ATPase and Spb4 RNA helicase
Source: eLife journal article supplement (doi:10.7554/elife.84877), 2023-03-17

Figure 4–Figure Supplement 1A

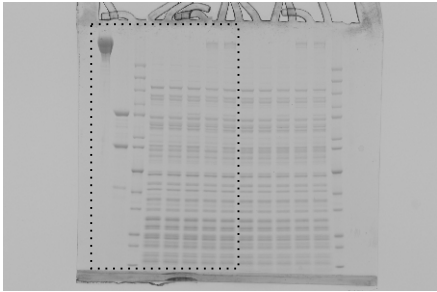

Figure 4–Figure Supplement 1A,  
anti-HA

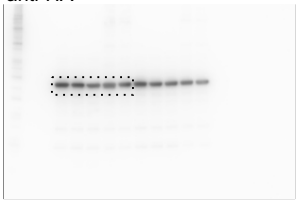

Figure 4–Figure Supplement 1B

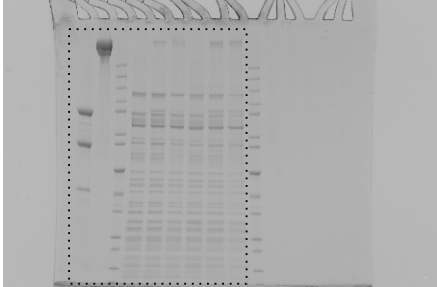

Figure 4–Figure Supplement 1B,  
anti-Ytm1

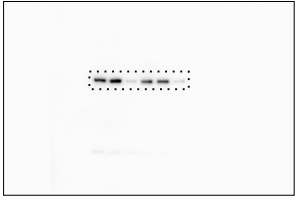

Figure 4–Figure Supplement 1B,  
anti-Has1

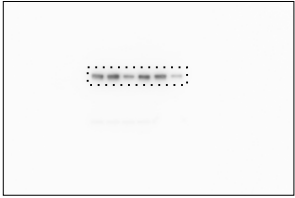

Figure 4–Figure Supplement 1B,  
anti-Ebp2

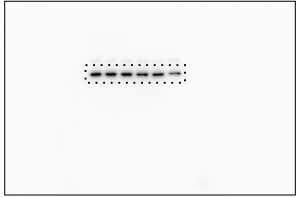

Figure 4–Figure Supplement 1B,  
anti-Noc3

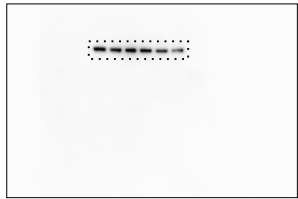

Figure 4–Figure Supplement 1B,  
anti-Nog1

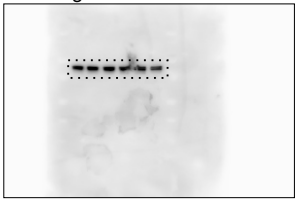

Figure 4–Figure Supplement 1B,  
anti-Nug1

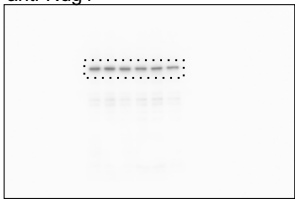

Figure 4–Figure Supplement 1B,  
anti-L3

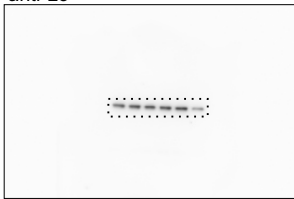

Figure 4–Figure Supplement 1C

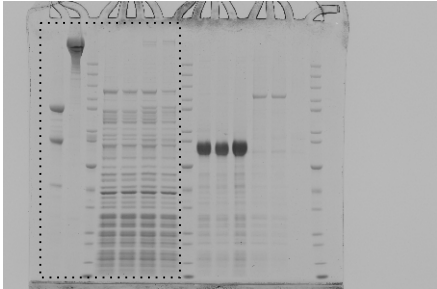

Figure 4–Figure Supplement 1C,  
anti-Ytm1

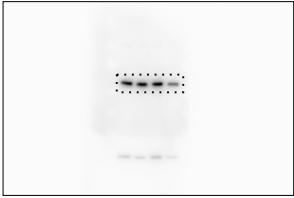

Figure 4–Figure Supplement 1C,  
anti-Has1

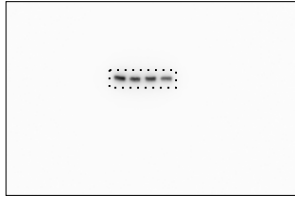

Figure 4–Figure Supplement 1C,  
anti-L3

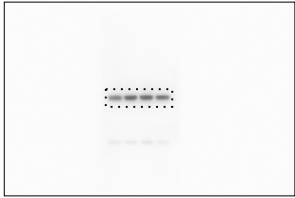

Supplement: fig4-figsupp1-data1 [file Figure4_Figure_Supplement1_Source_data.pdf › Figure4_Figure_Supplement1_Source_data1/Figure4_Figure_Supplement1_Source_data.pdf]
