# Supplementary material for: Concurrent remodelling of nucleolar 60S subunit precursors by the Rea1 ATPase and Spb4 RNA helicase
Source: eLife journal article supplement (doi:10.7554/elife.84877), 2023-03-17

Figure 4—Figure Supplement 2B, left panel

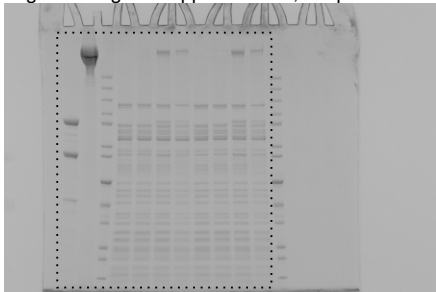

Figure 4—Figure Supplement 2B, right panel

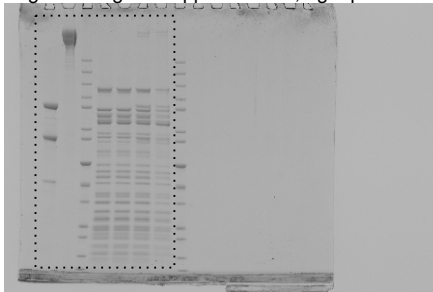

Figure 4—Figure Supplement 2B, left panel, anti-Ytm1

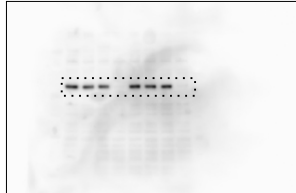

Figure 4—Figure Supplement 2B, left panel, anti-Has1

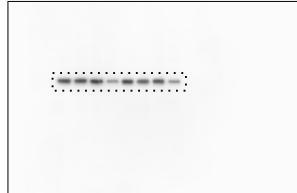

Figure 4—Figure Supplement 2B, left panel, anti-Ebp2

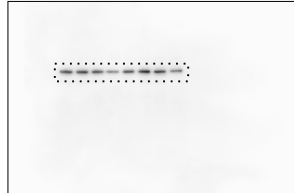

Figure 4—Figure Supplement 2B, left panel, anti-Noc3

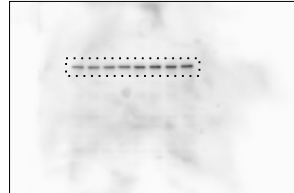

Figure 4—Figure Supplement 2B, left panel, anti-Nog1

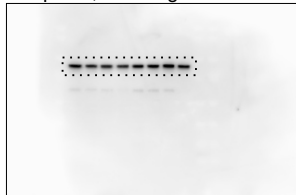

Figure 4—Figure Supplement 2B, left panel, anti-Nug1

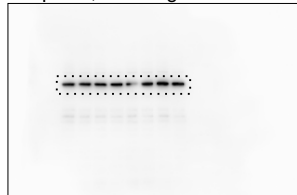

Figure 4—Figure Supplement 2B, left panel, anti-Nsa2

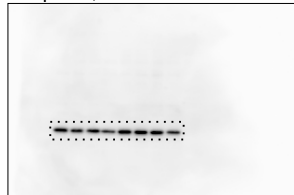

Figure 4—Figure Supplement 2B, left panel, anti-L3

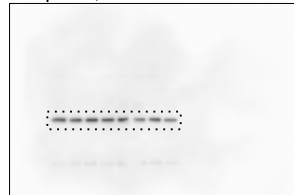

Figure 4—Figure Supplement 2B, right panel, anti-Ytm1

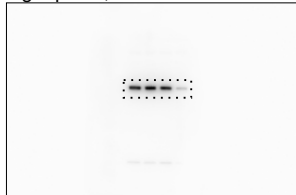

Figure 4—Figure Supplement 2B, right panel, anti-Has1

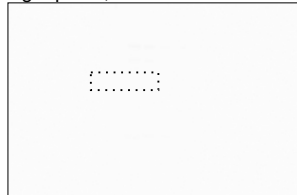

Figure 4—Figure Supplement 2B, right panel, anti-Ebp2

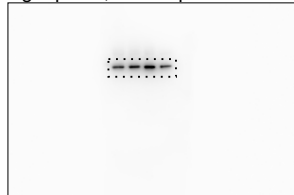

Figure 4—Figure Supplement 2B, right panel, anti-Noc3

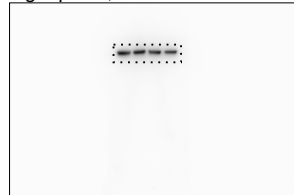

Figure 4—Figure Supplement 2B, right panel, anti-Nog1

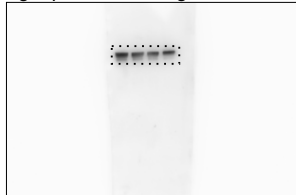

Figure 4—Figure Supplement 2B, right panel, anti-Nug1

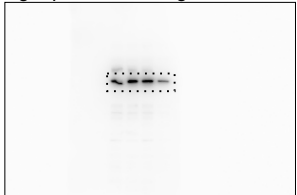

Figure 4—Figure Supplement 2B, right panel, anti-Nsa2

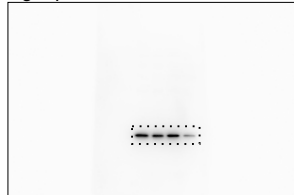

Figure 4—Figure Supplement 2B, right panel, anti-L3

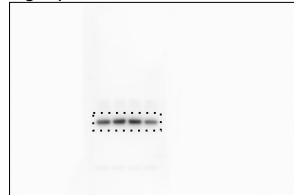

Supplement: fig4-figsupp2-data1 [file Figure4_Figure_Supplement2_Source_data.pdf › Figure4_Figure_Supplement2_Source_data1/Figure4_Figure_Supplement2_Source_data.pdf]
