# Supplementary material for: Concurrent remodelling of nucleolar 60S subunit precursors by the Rea1 ATPase and Spb4 RNA helicase
Source: eLife journal article supplement (doi:10.7554/elife.84877), 2023-03-17

Figure 4A

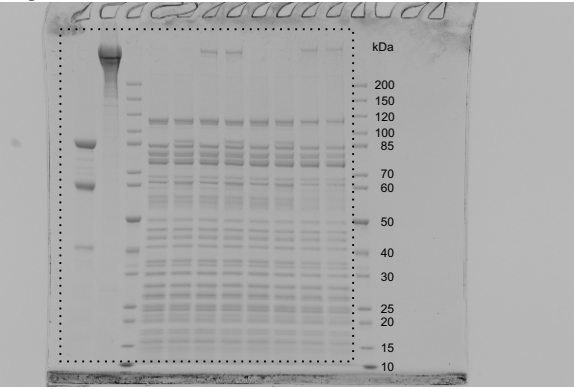

Figure 4A, anti-Ytm1

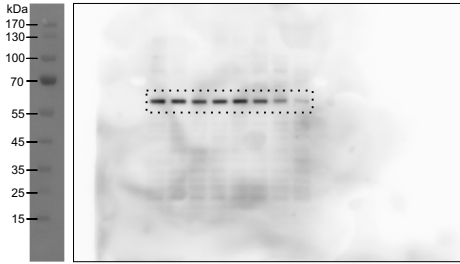

Figure 4A, anti-Has1

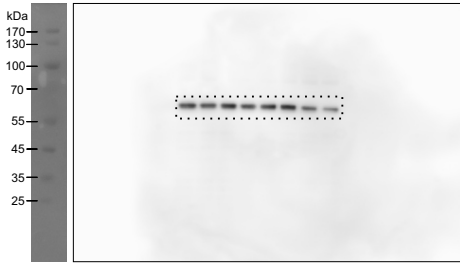

Figure 4A, anti-Noc3

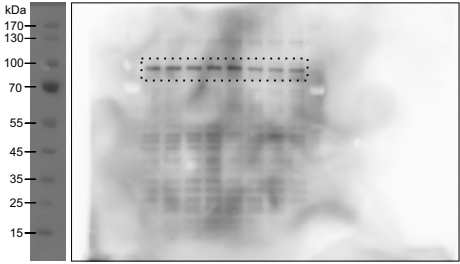

Figure 4A, anti-Nog1

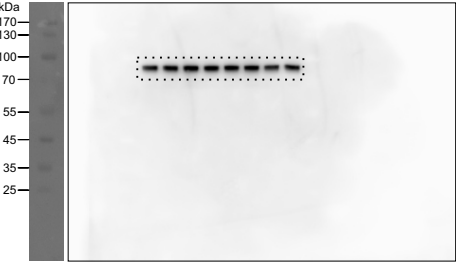

Figure 4A, anti-Nug1

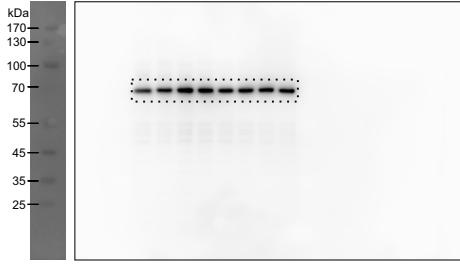

Figure 4A, anti-Nsa2

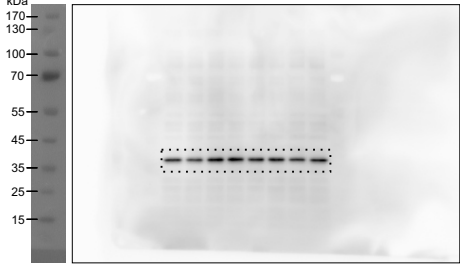

Figure 4A, anti-L3

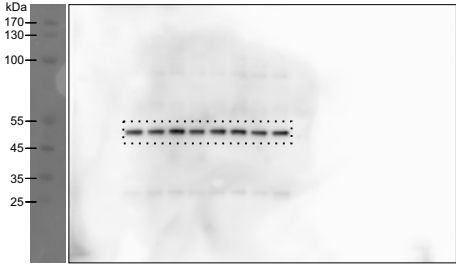

Supplement: fig4-data1 [file Figure4_Source_data_1.pdf › Figure4_Source_data/Figure4_Source_data_1.pdf]
