# Supplementary figures and images for: Concurrent remodelling of nucleolar 60S subunit precursors by the Rea1 ATPase and Spb4 RNA helicase
Source: eLife journal article supplement (doi:10.7554/elife.84877), 2023-03-17

Figure 1A

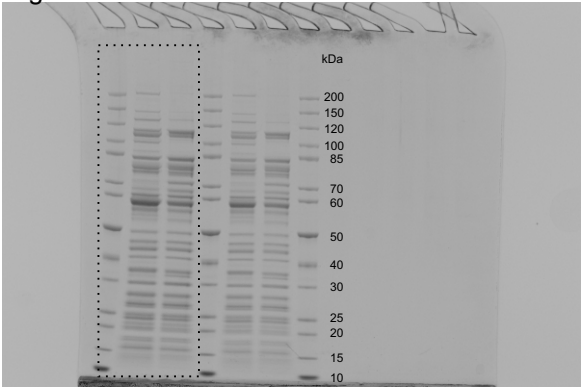

Figure 1D, left panel

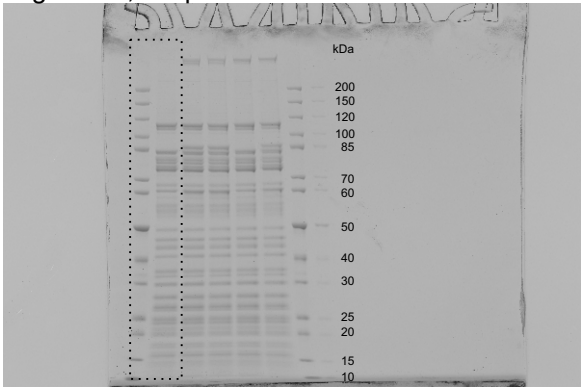

Figure 1D, right panel

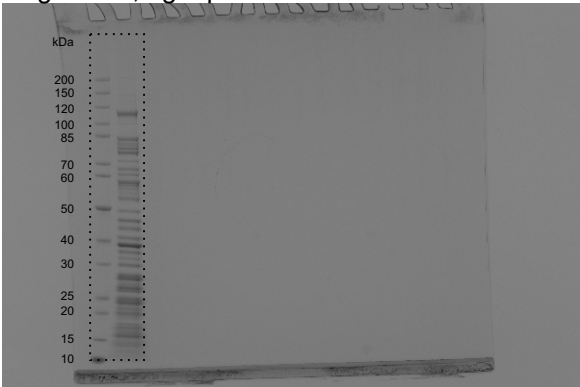

Supplement: fig1-data1 [file elife-84877-fig1-data1-v3.zip]
